# Supplementary material for: The construction of CRISPR/Cas9-mediated FRET 16S rDNA sensor for detection of Mycobacterium tuberculosis
Source: Royal Society of Chemistry journal article supplement (doi:10.1039/d3an00462g), 2023-01-01
Supplement: d3an00462g1.pdf [file d3an00462g1.pdf]

## Supporting Information

1  
2  
3  
4  
5  
6  
7  
8  
9  
10  
11  
12  
13  
14  
15  
16  
17  
18  
19  
20  
21  
22  
23

### **The Construction of CRISPR/Cas9-Mediated FRET 16S rDNA Sensor for Detection of *Mycobacterium tuberculosis***

Ming Zhou<sup>a</sup>, Xin Li<sup>a</sup>, Herui Wen<sup>a</sup>, Bin Huang<sup>a</sup>, Jiali Ren<sup>c\*</sup>, Jialin Zhang<sup>a,b\*</sup>

<sup>a</sup> *Jiangxi Provincial Key Laboratory of Functional Molecular Materials Chemistry,  
School of Chemistry and Chemical Engineering, Jiangxi University of Science and  
Technology, Ganzhou, 341000, P. R. China*

<sup>b</sup> *State Key Laboratory of Chemo/Biosensing and Chemometrics, College of Chemistry  
and Chemical Engineering, Hunan University, Changsha, 410082, P. R. China*

<sup>c</sup> *Hunan Key Laboratory of Forestry Edible Resources Safety and Processing,  
Changsha, 410004, P. R. China*

---

\* Corresponding author.

E-mail address: [jialinz2007@163.com](mailto:jialinz2007@163.com) (J. Zhang); [t20091483@csuft.edu.cn](mailto:t20091483@csuft.edu.cn) (J. Ren).

## 24 **Material and Methods**

25 **Sequence.** The detailed sequences of the 16S rDNA fragment of *M. tuberculosis*,  
26 Forward primer for preparing sgRNA, P1 probe, P2 probe and single base mismatch  
27 sequences could be seen in Table S1.

### 28 **Table S1**

29 The sequences of oligonucleotide used in this work.

| Oligonucleotide Type                  | Sequences                                                              |
|---------------------------------------|------------------------------------------------------------------------|
| P1                                    | 5'-TTTAGGTGC-3'                                                        |
| P2                                    | 5'- TAGGTGAGGTCTGCTACCCACAGCCGGTGCACCTAA-3'                            |
| 16S rDNA fragment                     | 5'-ACCGGCTGTGGGTAGCAGACCTCACCTA-3'                                     |
| 1 position mismatch                   | 5'- ACCGGATGTGGGTAGCAGACCTCACCTA-3'                                    |
| 5 position mismatch                   | 5'- ACCGGCTGTAGGTAGCAGACCTCACCTA-3'                                    |
| 10 position mismatch                  | 5'- ACCGGCTGTGGGTAACAGACCTCACCTA-3'                                    |
| 15 position mismatch                  | 5'- ACCGGCTGTGGGTAGCAGATCTCACCTA-3'                                    |
| Forward primer for<br>preparing sgRNA | 5'-TTAATACGACTCACTATAGGCTGTGGGTAGCAGACCTCACTTTTAGA<br>GCTAGAAATAGCA-3' |

30

31 **Preparation of simulated sputum samples.** The centrifuge tube containing 1 mL of  
32 the sputum samples and 4.0 mL of 4% sodium hydroxide solution was centrifuged at 4  
33 K rpm for 10 min and the supernatant was discarded. The sediment was washing using  
34 5 mL of sterile PBS buffer and M7H9 medium, this detection sample solution was  
35 prepared for use.

36 *M. tuberculosis* with the concentration of 10<sup>4</sup> CFU/mL was added to sterile detection  
37 samples to prepare the simulated positive sputum samples, and sterile detection sample  
38 were used as negative sputum samples.

39 **Acquisition of target fragments.** The DNA of strains was obtaining by Chelex-100  
40 strategy. 1 µL of *Ava*II restriction enzyme and 1 µL of *Msl*II restriction enzyme were

41 added to the supernatant after centrifugation in order, and the incubation was performed  
42 individually at 37 °C for 10 min.

43 **Preparation of UCNPs nanoparticle.** Briefly,  $\text{Er}(\text{NO}_3)_3 \cdot 6\text{H}_2\text{O}$  (55.4 mg),  
44  $\text{Yb}(\text{NO}_3)_3 \cdot 5\text{H}_2\text{O}$  (305.4 mg), and  $\text{Y}(\text{NO}_3)_3 \cdot 6\text{H}_2\text{O}$  (1225.6 mg) were added in 20 mL  
45 deionized water and incubated with EDTA (0.4 M, 20 mL). Then the mixed solution  
46 was quickly poured into NaF solution (2.1 g, 100 mL) under magnetic stirring and  
47 reacted in ice bath for 20 min and at 30 °C for 10 min, respectively. After centrifuged at  
48 8K rpm for 10 min, the precipitate was dried at 500 °C for 1 h under protection of  
49 nitrogen. Finally, 5 mg/mL of upconversion nanoparticles with a diameter of 20 nm was  
50 synthesized by adding 0.1 M PBS in tube.

51 **Synthesis of UCNPs@SiO<sub>2</sub> nanoparticle.** The prepared step of the functional  
52 nanoparticle could be showed in Figure S1. 0.2 mL IGEPAL CO-520, 6 mL hexane  
53 solution as well as the UCNPs (8 mg) was incubated under ultrasonic oscillations for 5  
54 min. Then, 40 μL of 30% aqueous ammonia was added and shook slowly until mixture  
55 became transparent to form microemulsion. 30 μL of 0.14 mM TEOS was subsequently  
56 added and mixed at 35 °C for 60 min. Reaction was completed by adding 4 mL of  
57 methanol to microemulsion. The functional nanoparticle was finally obtained after the  
58 centrifugation at 8000 rpm for 10 min using ethanol.

59 **Preparation of UCNPs@SiO<sub>2</sub>-COOH nanoparticle.** 150 μL of 0.68 mM APTES  
60 was added to 5 mL ethanol contained the prepared UCNPs@SiO<sub>2</sub> nanoparticle (25 mg).  
61 The mixture was stirred at 35 °C overnight, then centrifugation was performed at 8000  
62 rpm for 5 min. Sediment was dispersed in 4 mL of anhydrous DMF, followed by adding  
63 3 mL of DMF solution containing succinic anhydride (200 mg, 1.5 mM). The mixed  
64 solution was stirred at 35 °C overnight. The UCNPs@SiO<sub>2</sub>-COOH nanoparticle was

65 thus obtained after the centrifugation at 8000 rpm for 10 min using ethanol. Finally, the  
66 nanoparticles were dispersed in borate-buffered solution.

67

## 68 Results and Discussion

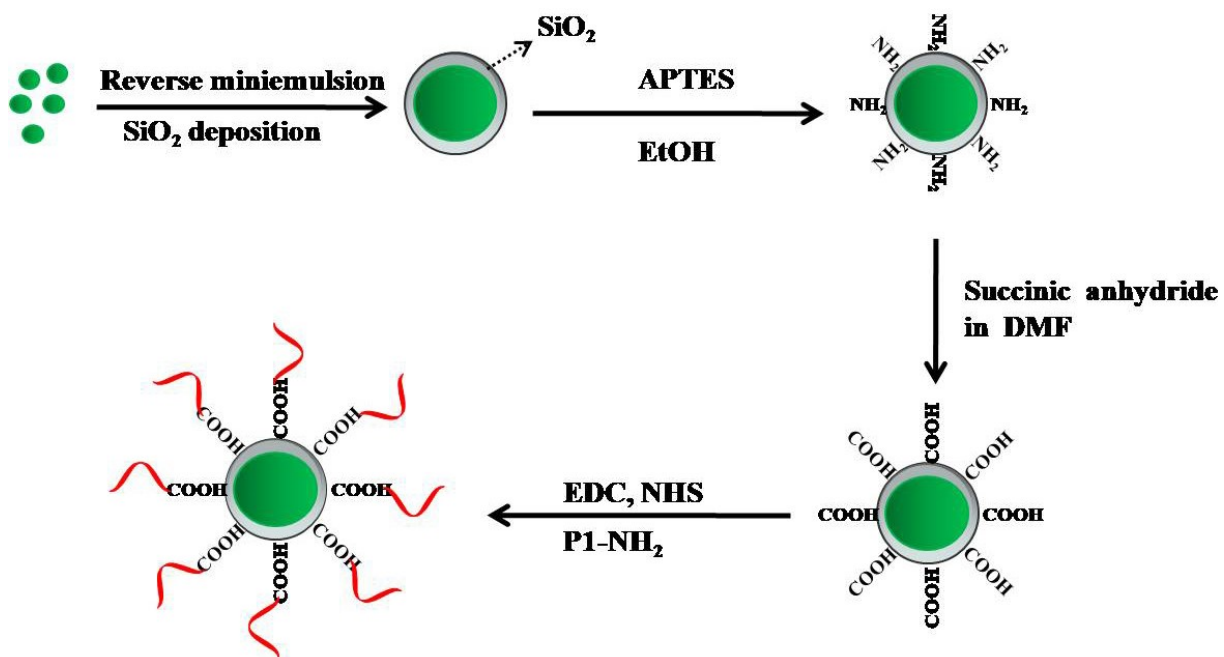

69

**UCNPs@SiO<sub>2</sub>-P1**

70 **Figure S1.** The functionalization of UCNP@SiO<sub>2</sub>-P1.

71

72

73

74

75

76

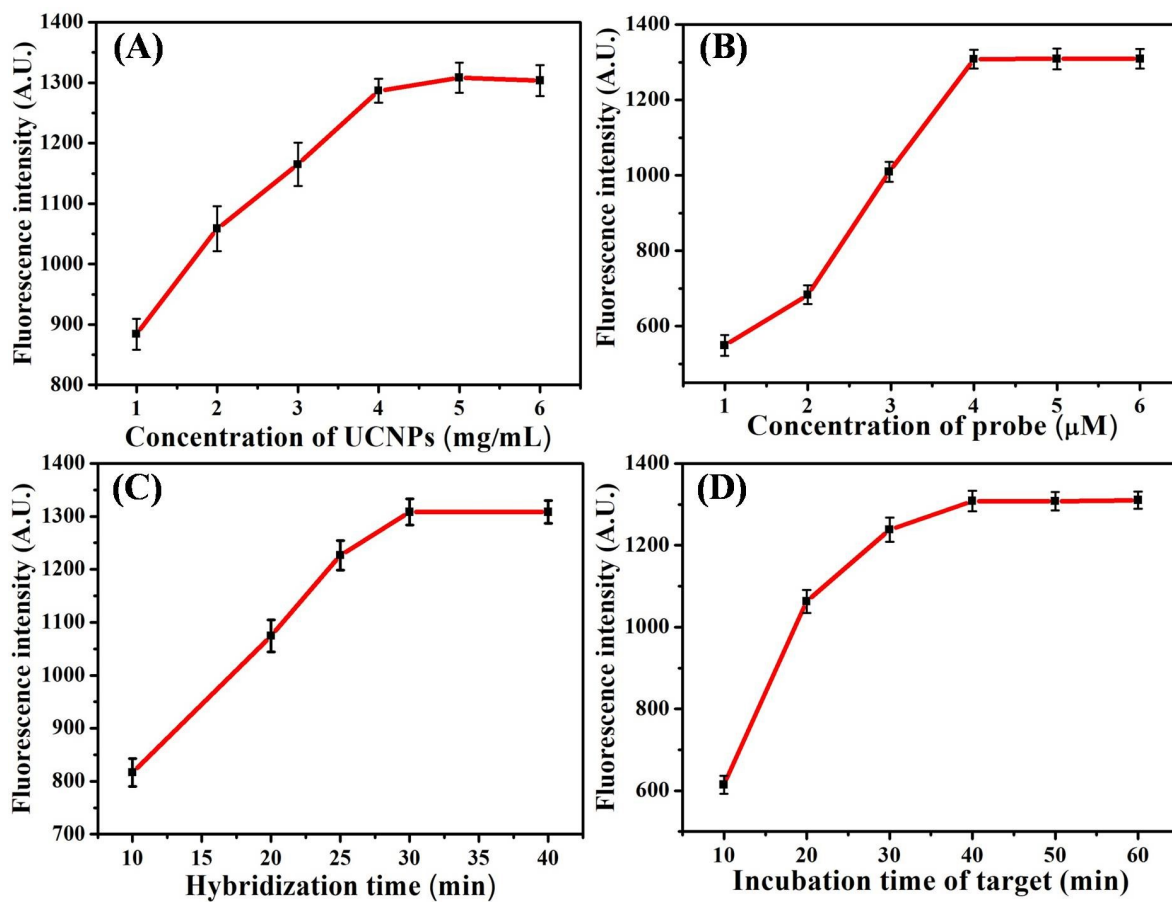

77

78 **Figure S2.** Optimization (A) the optimal concentration of UCNPs. (B) the optimal concentration of  
 79 probes. (C) the optimal concentration hybridization time between UCNPs@SiO<sub>2</sub>-P1 and  
 80 Fe<sub>3</sub>O<sub>4</sub>@Au-P2. (D) the optimal the CRISPR/Cas9 system reaction time during target detection. The  
 81 concentrations of target were at 10 pM. Error bars indicate standard deviation (n = 3).

82

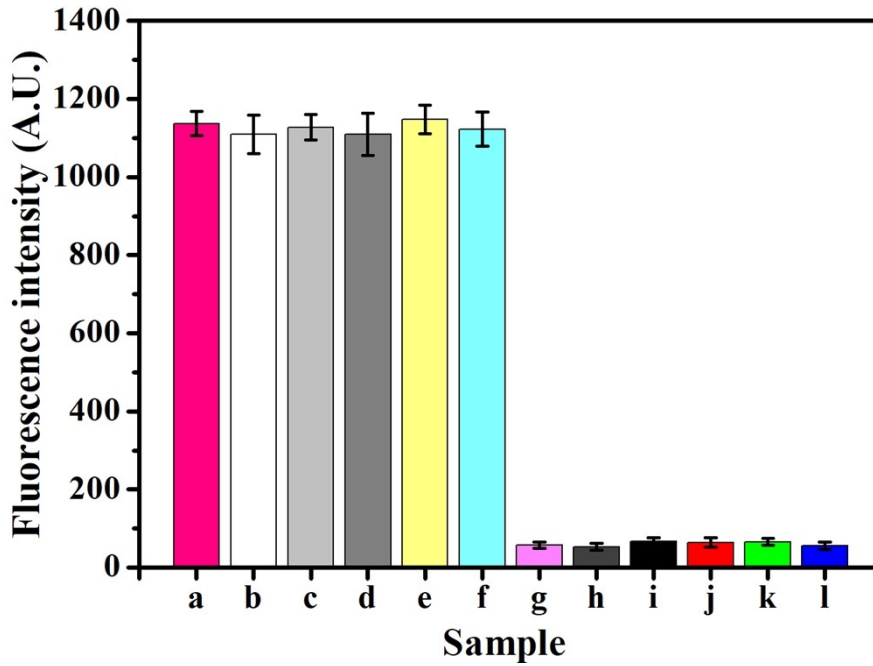

83

84 **Figure S3.** The fluorescent signal responses to different strains. (a) *M. tuberculosis* + *P. aeruginosa*,  
 85 (b) *M. tuberculosis*+ *S. enteritidis*, (c) *M. tuberculosis* + *E. coli*, (d) *M. tuberculosis*+ BCG vaccine,  
 86 (e) *M. tuberculosis* + *M. smegmatis*, (f) *M. tuberculosis*, (g) *P. aeruginosa*, (h) *S. enteritidis*, (i) *E.*  
 87 *coli*, (j) BCG vaccine, (k) *M. smegmatis*, (l) blank sample. The concentrations of these strains were  
 88 at  $10^5$  CFU/mL. Error bars indicate standard deviation (n = 3).

89

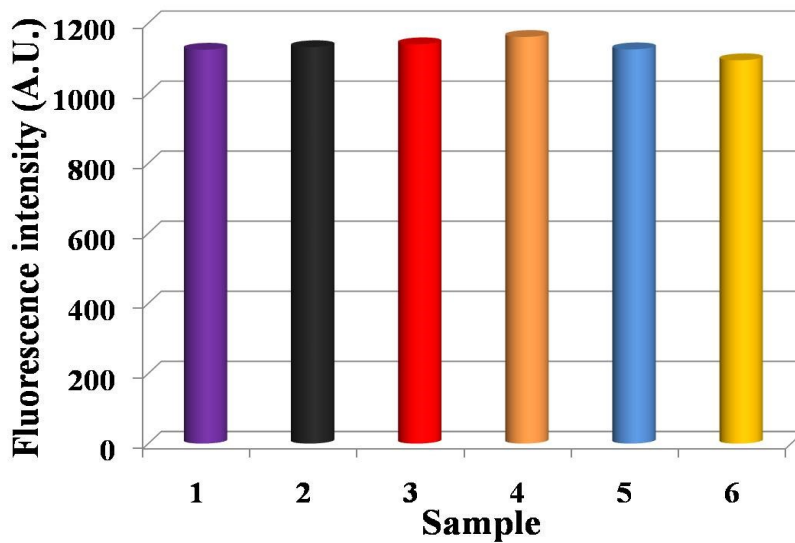

90

91 **Figure S4.** The repeatability study for detection of *M. tuberculosis* in M7H9 medium. The  
 92 concentrations of *M. tuberculosis* were  $10^5$  CFU/mL.

93

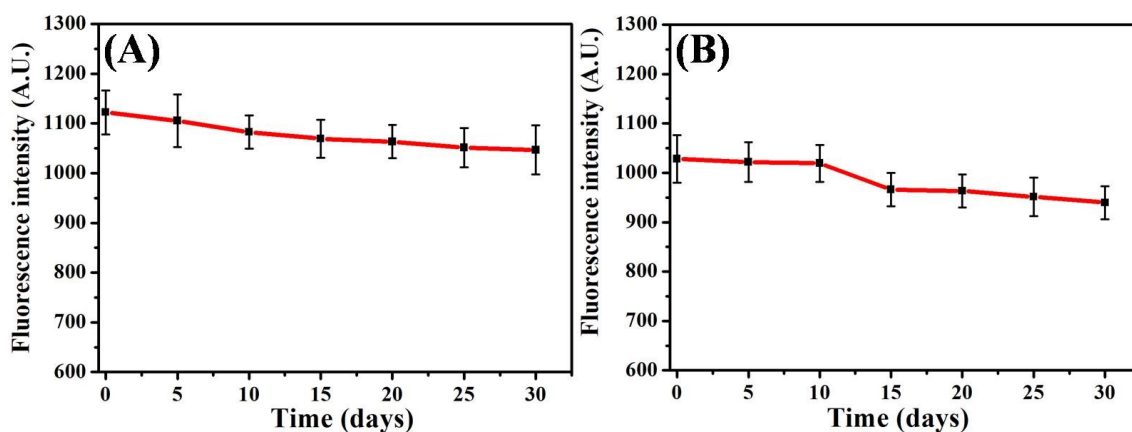

94

95 **Figure S5.** The stability study for detection of *M. tuberculosis* in M7H9 medium (A) and in  
 96 simulated sputum sample (B). The concentrations of *M. tuberculosis* were  $10^5$  CFU/mL.

97

98

99 **Table S2**

100 Recovery assay of *M. tuberculosis* in the simulated sputum samples.

| Samples  | Added<br>(CFU/mL) | Culture method<br>(CFU/mL) | Constructed sensor<br>(CFU/mL) | Recovery (%) | RSD (% , n=3) |
|----------|-------------------|----------------------------|--------------------------------|--------------|---------------|
| Sputum 1 | 30                | 29.79                      | 31.88                          | 106.27       | 0.95          |
| Sputum 2 | $3 \times 10^2$   | $3.15 \times 10^2$         | $2.83 \times 10^2$             | 94.33        | 1.56          |
| Sputum 3 | $3 \times 10^4$   | $2.86 \times 10^4$         | $2.99 \times 10^4$             | 99.67        | 2.05          |
| Sputum 4 | $3 \times 10^6$   | $3.06 \times 10^6$         | $2.88 \times 10^6$             | 96.00        | 1.38          |
| Sputum 5 | $3 \times 10^8$   | $2.96 \times 10^8$         | $3.08 \times 10^8$             | 102.67       | 2.42          |
| Sputum 6 | $3 \times 10^9$   | $3.26 \times 10^8$         | $3.12 \times 10^8$             | 104.00       | 1.94          |

101

102
